# Supplementary material for: Relationship between workers’ return to work, job retention and income in industrial accidents in Korea: a longitudinal study
Source: HighWire-hosted journal article supplement (doi:10.1136/bmjopen-2020-039948), 2021-04-01
Supplement: bmjopen-2020-039948supp002_data_supplement.pdf [file bmjopen-2020-039948supp002_data_supplement.pdf]

**Supplementary Table 2. Subgroup Analysis of Income Distribution According to Region (unit: million KRW)**

| Area                    | Before (2012)* |       | First (2012)* |       | Second (2013)* |       | Third (2014)* |       | Fourth (2015)* |       | Fifth (2016) |       | p-value‡ | First to Fifth (2012-2016)† |       | p-value§ |
|-------------------------|----------------|-------|---------------|-------|----------------|-------|---------------|-------|----------------|-------|--------------|-------|----------|-----------------------------|-------|----------|
|                         | Mean           | SD    | Mean          | SD    | Mean           | SD    | Mean          | SD    | Mean           | SD    | Mean         | SD    |          | Mean                        | SD    |          |
| Area                    |                |       |               |       |                |       |               |       |                |       |              |       | <0.0001  |                             |       | <0.0001  |
| Seoul (N=164)           | 30.23          | 14.16 | 32.87         | 19.27 | 22.37          | 15.49 | 22.78         | 14.12 | 23.99          | 14.93 | 23.60        | 13.54 |          | 25.12                       | 12.27 |          |
| Busan (N=141)           | 30.69          | 13.88 | 35.53         | 20.18 | 24.09          | 17.45 | 22.55         | 15.11 | 24.19          | 16.14 | 23.11        | 15.84 |          | 25.90                       | 14.28 |          |
| Daegu/Gyeongbuk (N=167) | 29.33          | 13.27 | 33.83         | 24.30 | 24.03          | 18.21 | 22.04         | 14.77 | 22.21          | 14.06 | 22.69        | 15.07 |          | 24.96                       | 14.18 |          |
| Gangwon (N=57)          | 28.58          | 11.32 | 32.38         | 18.41 | 15.82          | 11.91 | 15.57         | 12.68 | 17.94          | 13.49 | 20.48        | 19.71 |          | 20.44                       | 11.99 |          |
| Ulsan/Gyeongnam (N=172) | 36.58          | 16.52 | 43.71         | 27.22 | 33.17          | 24.01 | 30.33         | 19.54 | 30.62          | 18.77 | 29.45        | 18.93 |          | 33.46                       | 18.64 |          |
| Gyeonggi (N=331)        | 30.16          | 14.04 | 35.79         | 24.14 | 22.82          | 18.38 | 21.78         | 16.10 | 23.15          | 14.84 | 23.25        | 15.67 |          | 25.36                       | 14.13 |          |
| Incheon (N=128)         | 33.13          | 15.62 | 37.53         | 20.34 | 25.98          | 20.05 | 26.36         | 19.13 | 27.65          | 17.39 | 29.12        | 27.90 |          | 29.33                       | 17.65 |          |
| Jeolla (N=147)          | 27.77          | 13.62 | 36.14         | 20.69 | 23.41          | 19.73 | 21.77         | 18.28 | 24.28          | 16.85 | 21.99        | 15.91 |          | 25.52                       | 14.94 |          |
| Chungcheong (N=151)     | 30.76          | 13.85 | 38.95         | 25.12 | 25.35          | 18.62 | 23.92         | 17.14 | 24.81          | 16.93 | 25.06        | 17.02 |          | 27.62                       | 16.12 |          |

\* All adjusted to fit the wages of 2016, according to changes in South Korea's inflation rate

† Average of the first to fifth-year income

‡ Analyses were done by using a repeated measures ANOVA, linear mixed-effects model

§ Analyses were done annual income before occupational injury and the average of the first to fifth-year annual income by using a repeated measures ANOVA, linear mixed-effects model
